# Supplementary material for: Systematic Review: Effect of Health Education Intervention on Improving Knowledge, Attitudes and Practices of Adolescents on Malnutrition
Source: PubMed Central journal article supplement (PMC7469070; doi:10.3390/nu12082426), 2020-08-13
Supplement: nutrients-12-02426-s001.pdf [file nutrients-12-02426-s001.pdf]

Table 1: Cochrane Collaboration Risk of Bias Tool scale item descriptions

| Risk of bias item | Label                                                             | Description                                                                                                                                       |
|-------------------|-------------------------------------------------------------------|---------------------------------------------------------------------------------------------------------------------------------------------------|
| 1                 | Random sequence generation                                        | Was the allocation sequence adequately generated?                                                                                                 |
| 2                 | Allocation concealment                                            | Was allocation adequately concealed?                                                                                                              |
| 3                 | Participant characteristics                                       | Are the characteristics of the participants included in the study clearly described (inclusion/exclusion criteria)?                               |
| 4                 | Blinding of participants, personnel, and outcome assessors        | Was knowledge of the allocated intervention adequately prevented during the study?                                                                |
| 5                 | Intervention description                                          | Is the intervention of interest sufficiently described to allow replication?                                                                      |
| 6                 | Outcome measurement validity and reliability                      | Was there a description of the instrument reliability/validity (reference or coefficient) or did they use a well-established known valid measure? |
| 7                 | Selective reporting                                               | Were all outcome measures detailed in the methods reported in the results?                                                                        |
| 8                 | The use of theory                                                 | Did the study use any theory                                                                                                                      |
| 9                 | Were the participants followed up (after post-test)?              | Were participants followed up for a minimum of 2 months?                                                                                          |
| 10                | Was retention rate adequately described?                          | If yes, was retention rate $\geq 70\%$ at post intervention or post intervention follow?                                                          |
| 11                | Was intention to treat analysis used                              | The use of intention to treat?                                                                                                                    |
| 12                | Reporting of power calculation and attrition rate effect on power | Was a power calculation adequately reported                                                                                                       |
